# Supplementary material for: Synthesis and disassembly of an organometallic polymer comprising redox-active Co4S4 clusters and Janus biscarbene linkers
Source: Royal Society of Chemistry journal article supplement (doi:10.1039/d2cc00953f), 2022-01-01
Supplement: d2cc00953f1.pdf [file d2cc00953f1.pdf]

# Synthesis and Disassembly of an Organometallic Polymer Comprising Redox Active Co<sub>4</sub>S<sub>4</sub> Clusters and Janus Biscarbene Linkers

*Jonathan H. Gillen,<sup>a</sup> Connor A. Moore,<sup>a</sup> My Vuong,<sup>a</sup> Juvairia Shajahan,<sup>b</sup> Mitchell R. Anstey,<sup>c</sup>*

*Jeffery R. Alston,<sup>b</sup> and Christopher M. Bejger<sup>\*a</sup>*

<sup>a</sup>Department of Chemistry, The University of North Carolina at Charlotte, Charlotte, North Carolina 28223, United States

<sup>b</sup>The Joint School of Nanoscience and Nanoengineering, North Carolina A&T State University, Greensboro, NC 27401, United States

<sup>c</sup>Department of Chemistry, Davidson College, Davidson, NC 28035, United States

## Supporting Information

|                                                                                       |     |
|---------------------------------------------------------------------------------------|-----|
| I. Chemicals, Synthetic Details, & General Information .....                          | S3  |
| II. Single Crystal X-ray Diffraction Figures.....                                     | S7  |
| III. Scanning Electron Micrographs & Energy Dispersive X-ray Spectroscopy Scans ..... | S8  |
| IV. Nuclear Magnetic Resonance Spectroscopy .....                                     | S10 |
| V. Infrared Spectroscopy .....                                                        | S14 |
| VI. X-ray photoelectron spectroscopy .....                                            | S14 |
| VII. UV-Vis Absorption Spectroscopy.....                                              | S16 |
| VIII. Surface Area Analysis .....                                                     | S16 |
| IX. Electrochemistry.....                                                             | S17 |
| X. Digestion/Excision Experiment.....                                                 | S18 |
| XI. SEM Micrographs of Modulated Polymerization .....                                 | S18 |
| XII. Pre and Post Cyclic Voltammetry SEM/EDS Study.....                               | S19 |
| XIII. Characterization of <b>Co<sub>4</sub>S<sub>4</sub>-MCOP-Et</b> .....            | S20 |
| XIV. X-ray Diffraction Procedures and Tables .....                                    | S21 |
| XV. References .....                                                                  | S24 |

## I. Chemicals, Synthetic Details, & General Information

All manipulations were performed under an inert atmosphere of dry N<sub>2</sub> using a Schlenk line or MBraun UniLab Pro glovebox unless otherwise noted. Tetrahydrofuran (THF), toluene, dichloromethane (DCM), hexane, and diethyl ether were purged with N<sub>2</sub> and dried on an MB-SPS solvent purification system from MBraun. Acetonitrile anhydrous (99.8%, Aldrich), benzene anhydrous (Drisolve), 1,4-dioxane anhydrous (99.8%, Alfa Aesar) were freeze pump thawed 3-4x. NaH 60% in mineral oil (Aldrich) for imidazolium deprotonation was washed thoroughly over a medium filter with hexane under a N<sub>2</sub> atmosphere and pumped dry. All other chemicals were purchased from commercial sources and used as received, including N,N-dimethylformamide anhydrous/under argon (99.8%, Alfa Aesar), 1,2,4,5 benzene tetrahydrochloride (95%, Aldrich), formic acid (96%, Alfa Aesar), hydrochloric acid (Macron Fine Chemicals), 2-bromopropane (99%, TCI), bromoethane (98% Alfa Aesar), sodium carbonate monohydrate (99.5%, Alfa Aesar), anhydrous potassium carbonate (99%, EMD), benzimidazole (98%, Acros Organics), cobalt (II) chloride anhydrous (99.7%, Alfa Aesar), triisopropylphosphine (98%, Alfa Aesar), bis(trimethylsilyl)-sulfide (95%, Acros Organics), KOtBu (potassium tert-butoxide, 98%, Aldrich), and potassium chunks in mineral oil (98%, Alfa Aesar).

**Synthesis of 1,3-Dihydro-1,3-bisisopropyl-2H-benzimidazol-2-ylidene (Pr<sup>i</sup><sub>2</sub>NHCBz) (3).** The free carbene was prepared using a modified literature prep.<sup>1</sup> KOtBu (208 mg, 1.85 mmol) was placed in a 20 mL vial inside the glovebox and dissolved in THF (6 mL). 1,3-Diisopropylbenzimidazolium bromide<sup>2</sup> (526 mg, 1.85 mmol) was added to the vial and the suspension was stirred for one day at room temperature. The suspension was filtered to yield a yellow liquid, which was dried in vacuo to give free carbene **3** as an off-white solid. Yield 333 mg (88%).

**Synthesis of biscarbene 4.** 1,1',3,3-Tetra-isopropyl-5,5'-bibenzimidazolium bromide was first prepared following a modified procedure.<sup>44</sup> Briefly, the reported prep yielded a product with an 85% purity (as measured via <sup>1</sup>H-NMR). The reaction was repeated three times on the resulting product of precursory reactions to achieve a 98% purity of an overall 25% yield. All solid product was washed with chloroform to remove any dimethyl amine that formed during the reaction. The free biscarbene was then prepared following a modified procedure by Bielawski and coworkers.<sup>45</sup> The imidazolium dibromide (100 mg, 0.20 mmol), NaH (12.2 mg, 0.51 mmol), and KOtBu (2 mg, 18 μmol) were suspended in THF or benzene (5 mL) and stirred for 2 days. The resulting suspension was syringe filtered and dried in vacuo producing a yellow/tan solid product. A concentrated solution of the biscarbene in THF layered with hexanes produced X-ray quality single crystals. Yield: 25mg (37%). (*Note: freeze drying from benzene produces a yellow cotton candy like solid*). <sup>1</sup>H NMR (500 MHz, C<sub>6</sub>D<sub>6</sub>) δ 7.00 (2 H, s), 4.48 (4 H, sept), 1.65 (24 H, d) ppm. <sup>13</sup>C NMR (125 MHz, C<sub>6</sub>D<sub>6</sub>) δ 225.07, 131.81, 90.06, 49.51, 23.46 ppm.

**Synthesis of Co<sub>4</sub>S<sub>4</sub>(Pr<sup>i</sup><sub>2</sub>NHCBz)<sub>4</sub> (2).** Co<sub>4</sub>S<sub>4</sub>(P<sup>i</sup>Pr<sub>3</sub>) (**1**) (251 mg, 0.25 mmol) and Pr<sup>i</sup><sub>2</sub>NHCBz (**3**) (253 mg, 1.5 mmol) were placed in a 25 mL Schlenk flask and dissolved in THF (10 mL). The dark yellow-green solution was stirred at 60 °C under an N<sub>2</sub> atmosphere for two days and then refluxed at 78 °C for an additional two days. The resulting dark red solution was dried in vacuo, concentrated in

ether (2mL), syringe-filtered, and placed in a 20 mL vial. After three days sealed and undisturbed, X-ray quality crystals formed and were gently washed with chilled ether (4 x 3 mL). Yield: 296 mg (quant.) (single crystal yield 30%).  $^1\text{H}$  NMR (500 MHz,  $\text{C}_6\text{D}_6$ )  $\delta$  12.54 (12 H, s (br)), 6.66 (2H, s), 6.45 (2H, s) ppm. Anal. Calc. for  $\text{Co}_4\text{S}_4\text{N}_8\text{C}_{52}\text{H}_{72}$ : C 53.93%, H 6.63%, N 8.98%. Found: C 49.60%, H 6.22%, N 8.58%.

**Synthesis of  $\text{Co}_4\text{S}_4\text{-MCOP}$ .** Cluster **1** (30.8 mg, 0.0306 mmol) and biscarbene **4** (25.0 mg, 0.0766 mmol) were weighed into two, separate 20 mL vials and each dissolved in benzene (2.5 mL). The solutions were then transferred and mixed into a 15 mL Chemglass pressure vessel and sealed under a  $\text{N}_2$  atmosphere. The vessel was placed in an oven at 100 °C. After 2-5 days the resulting purple solid was separated by centrifugation and washed with THF ( $6 \times 1$  mL) inside the glovebox. Subsequent drying under vacuum produced a black solid with substantially less volume. Yield: 14 mg (45%). The reaction has also been repeated using toluene, dioxane, and THF with similar yields/products (~20-50%).

We also prepared a less sterically hindered tetrakis-N-ethyl-biscarbene in order to probe the steric effect of the linker on crystallinity. Polymers were synthesized using this smaller linker under the same conditions listed above. The  $\text{Co}_4\text{S}_4\text{-MCOP-ET}$  solids were similar in color, morphology, and composition via SEM and EDS. Structurally, the PXRD pattern of this ethyl analog did not differ from that of  $\text{Co}_4\text{S}_4\text{-MCOP}$ . Fabricated electrodes using the polymer made with tetrakis-N-ethyl-biscarbene linkers exhibit one oxidation at a similar potential. See **Section XIII** below for PXRD, SEM, EDS, and CV of this derivative.

**Depolymerization of  $\text{Co}_4\text{S}_4\text{-MCOP}$ .** A suspension of polymer (13.8 mg) in deuterated benzene (1.2 mL) was mixed with a solution of free carbene  $\text{Pr}^i_2\text{NHCMe}_2$  (48 mg, ~20 equiv., 1.2 mL) in a 2-dram vial. The solution was stirred for two days inside the glovebox on a hotplate at 50 °C. During this time, the majority of the solid dissolved and the solution turned dark, reddish brown. The solution was allowed to sit for several hours before an aliquot (1 mL) was taken from the top of the reaction mixture and analyzed by NMR.

## **Characterization**

### *Nuclear Magnetic Resonance (NMR) Spectroscopy*

NMR spectra were obtained on a Jeol ECA-500 NMR for  $^1\text{H}$  (500 MHz),  $^{13}\text{C}$  (125 MHz), and  $^{31}\text{P}$  (202 MHz). NMR tubes were prepared using deuterated solvents purchased from Cambridge Isotope Laboratories >95% and sealed by parafilm or a J-Young needle valve.

### *Thermogravimetric Analysis (TGA)*

Thermogravimetric analysis was performed on vacuum dried solid in a platinum pan using a Mettler Toledo TGA/SDTA851e supplied by compressed  $\text{N}_2$ .

### *Electrochemistry*

All electrochemical measurements were obtained on a Gamry 1000E potentiostat and were recorded on Gamry Framework Software (Version 7.02). Analysis of the data was done using

Gamry Echem Analyst (Version 7.02). Measurements were performed with a three-electrode setup with a working glassy carbon electrode (3.0 mm), a platinum wire counter electrode, and a platinum wire as a pseudo-reference electrode. The solid polymer was physically absorbed onto the surface of the glassy carbon electrode while still wet with THF. Approximately 2 mg of wet polymer covering  $\frac{1}{2}$  of the surface of the GCE were loaded for each measurement. All measurements were collected inside the glovebox under a dinitrogen atmosphere. Ferrocene was used post analytically to reference voltages. CV scans taken with modified electrodes did not exhibit redox activity when the adsorbed solid is physically removed. Additionally, no oxidation or reduction events could be measured (with a clean working electrode) in the residual solution after the polymer-modified electrode had been submerged for an hour.

#### *Electronic Absorption Spectroscopy*

A Cary 300 Bio UV-Visible Spectrometer running Scan v1.00(6) was used to collect the UV-vis spectra with solutions of THF inside of sealed quartz cuvettes to maintain an air free atmosphere. The dried polymer was run as a powdered solid, sealed between two slides, and suspended in bSi-201 quick cure epoxy to prevent oxidation.

#### *Scanning Electron Microscopy and Energy Dispersive X-ray Spectroscopy*

Scanning electron micrographs were obtained on a JEOL JSM-6460LV SEM instrument using a 5-15kV accelerating voltage while collecting data through the SEM Control User Interface (Version 6.21). Energy dispersive X-ray spectrographs were taken using the built in EDAX and worked up using the APEX software. SEM samples were pumped down and placed on a copper or carbon tape background with a 60 second air exposure while being loaded. During this exposure, samples would occasionally produce smoke from an exothermic reaction.

#### *Single Crystal X-ray Diffraction*

Single Crystal X-ray diffraction was performed using an Oxford Diffraction Gemini A Ultra SCXRD. Samples were dried for 30 min by vacuum and suspended in Nujol mineral oil before being transferred to the sampling stage and mounted on loops.

#### *X-ray Photoelectron Spectroscopy*

X-ray Photoelectron Spectroscopy was collected using a Thermo Scientific ESCALAB Xi with a twin crystal monochromatic Al K $\alpha$  source (500  $\mu$ m), and a pass energy of 20.0 eV, with a spot size of 200  $\mu$ m. Samples were stored in an inert atmosphere and transferred rapidly to the loading chamber of the XPS after mounting the sample. To prevent charging of the surface, all samples were probed in the presence of a low energy electron flood gun. Charging can lead to shifting and distortion of the XPS spectra, so a low energy electron flood gun was used to limit charging.

#### *Powder X-ray Diffraction*

Powder X-ray diffraction patterns were obtained from 11-BM APS Synchrotron Beamline (Bending Magnet Source) at the Argonne National Laboratory (Lemont, IL, USA). X-ray samples were pumped dry, ground by mortar and pestle, and packed into a 1.105 mm outer diameter, 0.1 mm wall Kapton capillary inside a nitrogen glovebox. The capillary ends were then sealed with bSi-201 quick cure epoxy and allowed to cure for at least 24 hours.

High resolution synchrotron powder diffraction data were collected using beamline 11- BM at the Advanced Photon Source (APS), Argonne National Laboratory using an average wavelength of  $\lambda = 0.4581 \text{ \AA}$ . Discrete detectors covering an angular range from  $0.5$  to  $50^\circ 2\theta$ , with data points collected every  $0.001^\circ 2\theta$  and scan speed of  $0.01^\circ/\text{s}$ . The predicted structure was generated by forming a diamond cubic crystal structure with each  $\text{Co}_4\text{S}_4$  unit representing a single lattice point and a lattice constant of  $a = 29.56 \text{ \AA}$  as based upon the SCXRD data for the free carbene and model cluster. It should be noted that this structure omits the alkyl groups and assumes a carbene-cobalt bond length and core geometry as found in the model cluster.

#### *Surface Area Analysis*

Surface area was estimated by BET isotherms using a Quantachrome Instruments NOVA 2200e Surface Area & Pore Size Analyzer supplied by compressed  $\text{N}_2$ . Samples were pumped dry for 24 hours with a potential air exposure while the BET tube was being transferred to the degassing line.

## II. Single Crystal X-ray Diffraction Figures

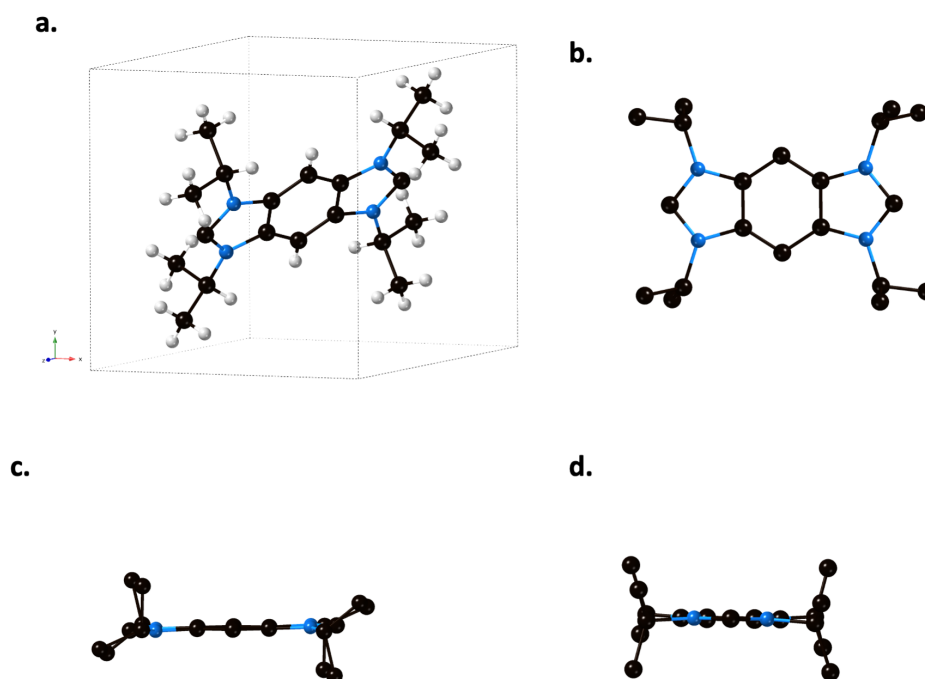

**Figure S1.** Single crystal X-ray structure of **4** depicted as ball-and-stick. (a) unit cell; (b) top view; (c) side view; (d) front view looking down C<sub>NHC</sub>. Nitrogen, light blue; carbon, black; hydrogen, white.

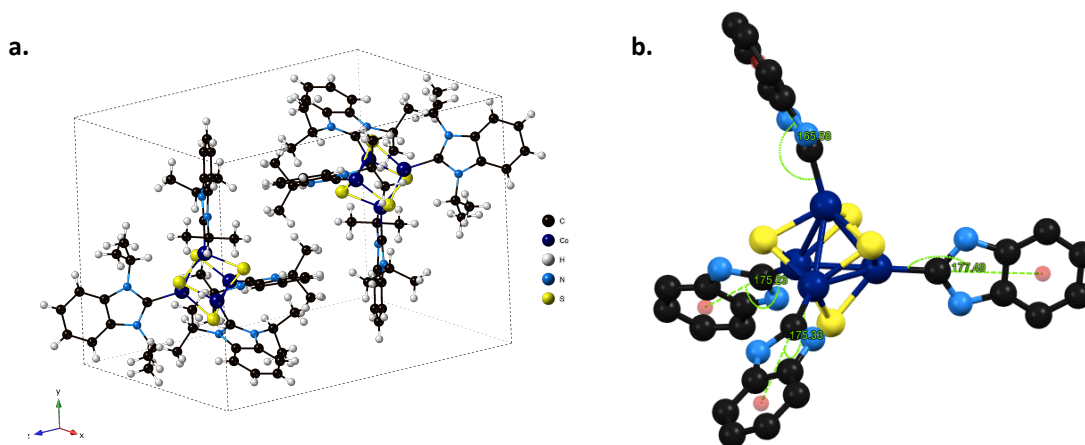

**Figure S2.** Single crystal X-ray structure of **2** depicted as ball-and-stick. (a) unit cell; (b) view depicting the bent, nonlinear (166°) connection of the top Co-C<sub>NHC</sub> bond with isopropyl groups and hydrogen atoms omitted. Cobalt, dark blue; sulfur, yellow; nitrogen, light blue; carbon, black; hydrogen, white.

### III. Scanning Electron Micrographs & Energy Dispersive X-ray Spectroscopy Scans

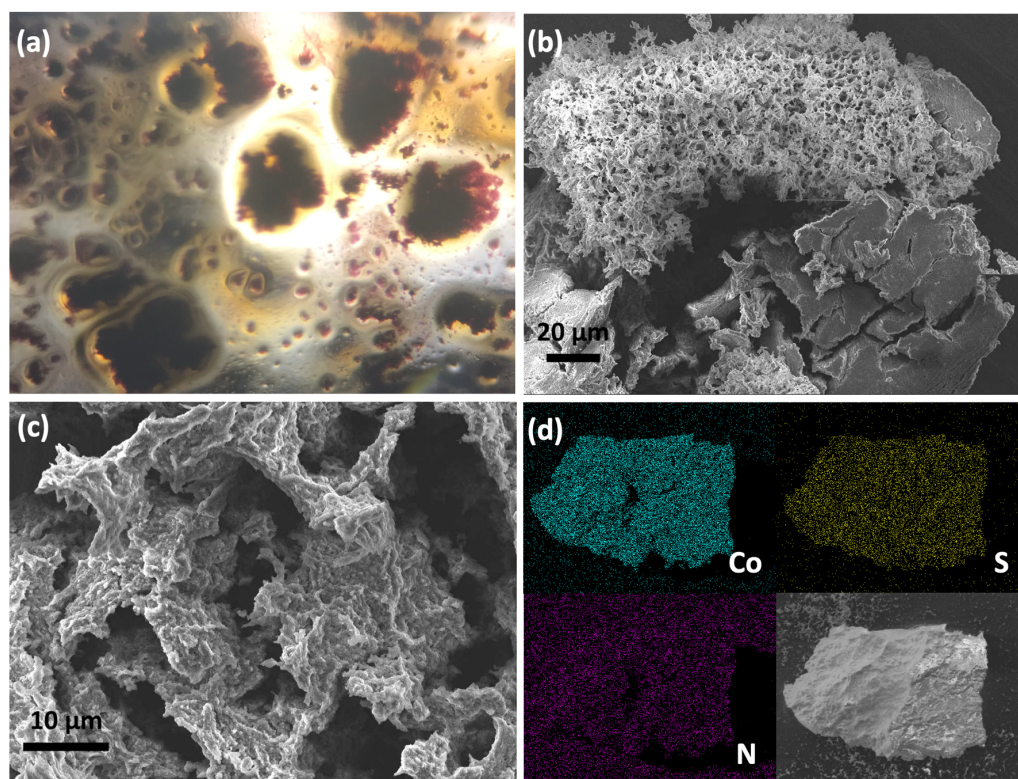

**Figure S3.** (a) Microscope image of  $\text{Co}_4\text{S}_4\text{-MCOP}$  at 30X magnification; (b) and (c) SEM micrographs of  $\text{Co}_4\text{S}_4\text{-MCOP}$ ; and (d) EDS analysis mapping of  $\text{Co}_4\text{S}_4\text{-MCOP}$  (teal: cobalt; yellow: sulfur; purple: nitrogen).

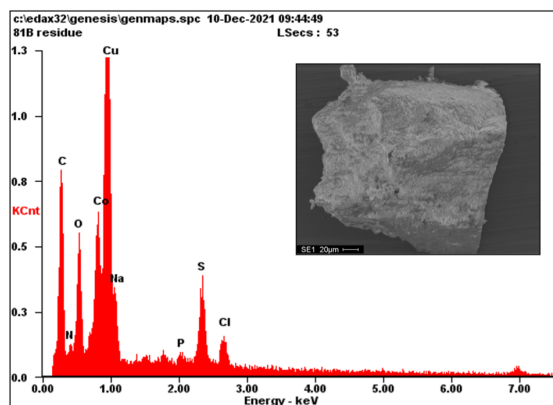

| Element | Wt%        | At%   |
|---------|------------|-------|
| CK      | 28.55      | 57.66 |
| NK      | 02.22      | 03.85 |
| OK      | 05.78      | 08.76 |
| CoL     | 11.12      | 04.58 |
| CuL     | 40.35      | 15.40 |
| NaK     | 02.92      | 03.08 |
| PK      | 00.70      | 00.55 |
| SK      | 05.67      | 04.29 |
| ClK     | 02.69      | 01.84 |
| Matrix  | Correction | ZAF   |

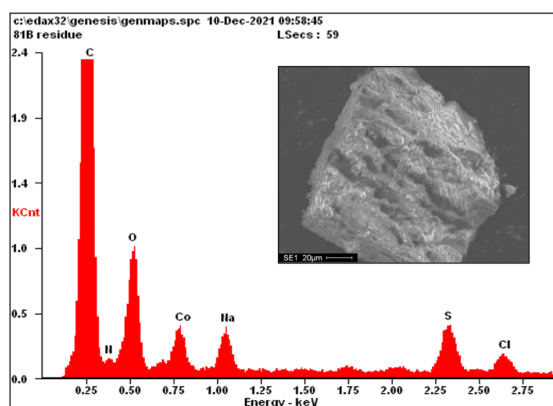

| Element | Wt%        | At%   |
|---------|------------|-------|
| CK      | 65.64      | 78.09 |
| NK      | 04.76      | 04.86 |
| OK      | 11.93      | 10.65 |
| CoL     | 08.68      | 02.10 |
| NaK     | 02.17      | 01.35 |
| SK      | 04.59      | 02.05 |
| ClK     | 02.23      | 00.90 |
| Matrix  | Correction | ZAF   |

**Figure S4.** EDS survey scans and elemental composition of  $\text{Co}_4\text{S}_4\text{-MCOP}$ . The top spectrum was collected using copper tape as a background and the bottom spectrum was run with the sample placed on carbon tape.

#### IV. Nuclear Magnetic Resonance Spectroscopy

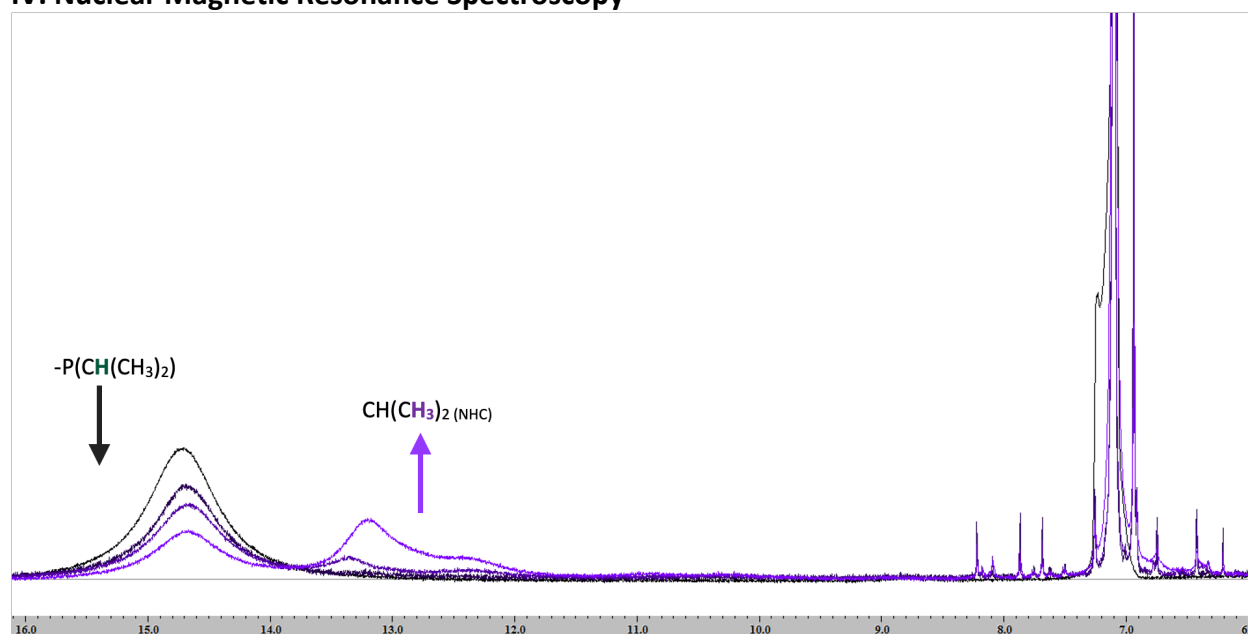

**Figure S5.** Polymerization reaction monitored via  $^1\text{H}$ -NMR in  $\text{C}_6\text{D}_6$ . NMR was taken with cluster **1** only (black) then 2.5 equivalents of biscarbene **4** were added and the NMR was collected again after 1 hour, 18 hours, and 72 hours. The same experiment was also run while heating but proceeded too quickly to monitor.

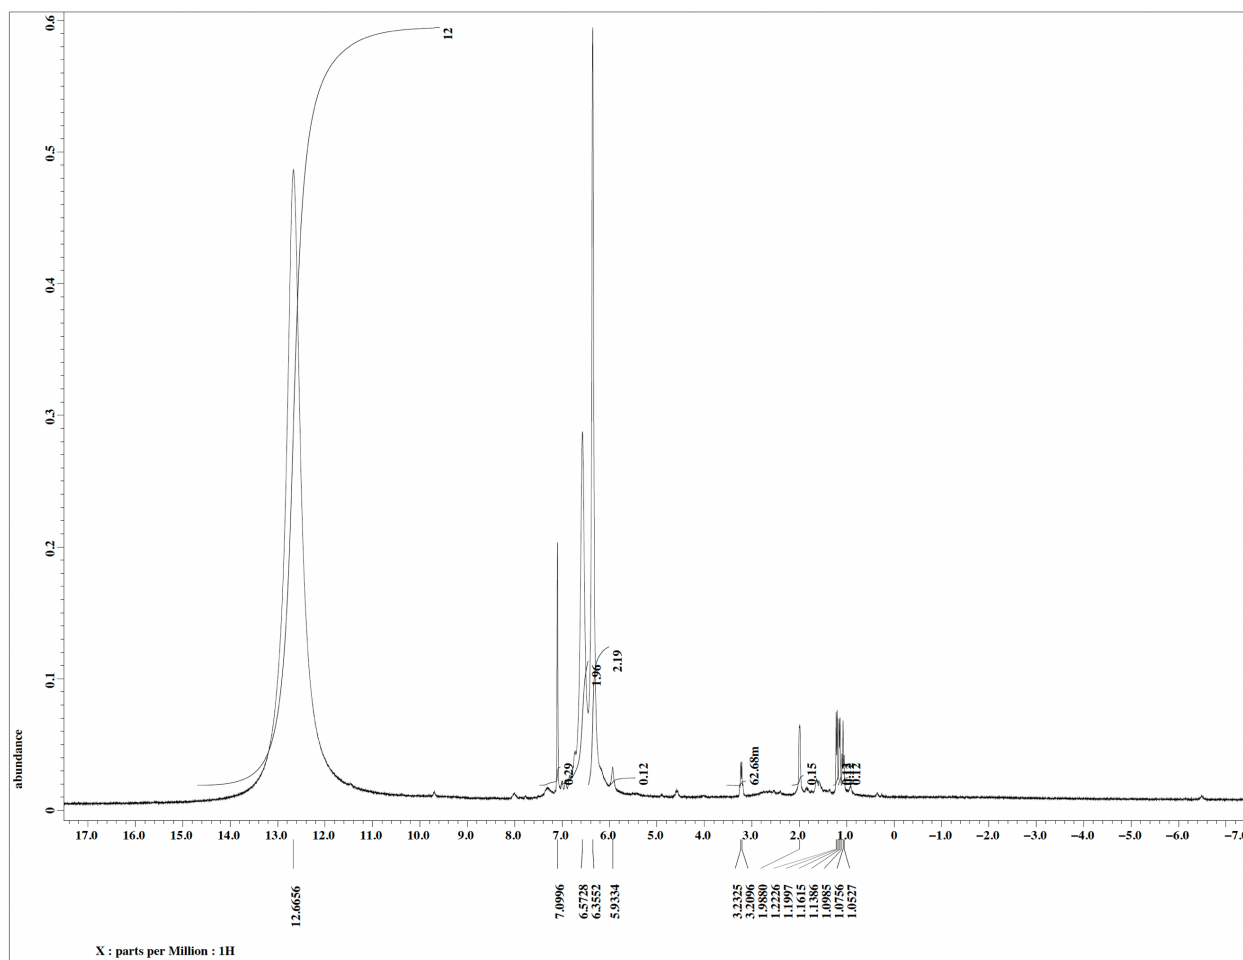

**Figure S6.**  $^1\text{H}$ -NMR spectrum of **2** in  $\text{C}_6\text{D}_6$ .

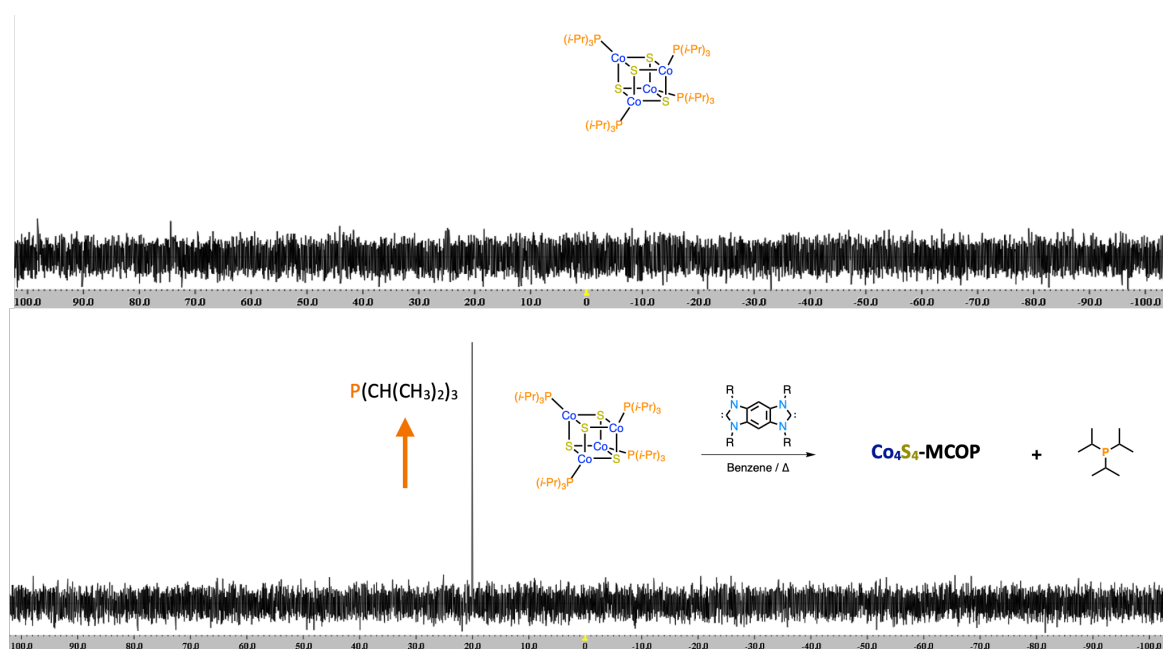

**Figure S7.** Polymerization reaction monitored via  $^{31}\text{P}$ -NMR in  $\text{C}_6\text{D}_6$ . Cluster **1** (top spectrum) and Cluster **1** mixed with two equivalents of biscarbene **4** after heating for one hour (bottom spectrum).

(a)

Sample 2  
20 KHz MAS  
CP: 2ms Contact  
147KHz SPINAL64 Decuplig

Current Data Parameters  
NAME uncc5\_2100809  
EXPNO 3  
PROCNO 1

F2 - Acquisition Parameters  
Date\_ 20210809  
Time 13.15 h  
INSTRUM spect  
PROBHD H134610\_0001 ( CP  
PULPROG 2200  
SOLVENT None  
NS 2168  
DS 8  
SWH 44117.648 Hz  
FIDRES 40.106953 Hz  
AQ 0.0249333 sec  
RG 199.22  
DW 11.333 usec  
DE 6.58 usec  
TE 13.5 K  
D1 2.00000000 sec  
ZGPGTNS  
SFO1 125.7904828 MHz  
NUC1 13C  
P15 2000.00 usec  
PLW1 36.00000000 W  
SFO2 500.2117507 MHz  
NUC2 1H  
CNSF21 1.0000000  
CPDPRG2 spinal64  
P3 1.80 usec  
PCPD2 3.50 usec  
PLW2 0 W  
PLW12 45.00000000 W  
SPNAM[0] ramp70100.100  
SFO1D 0.500  
SPOTFS0 0 Hz  
SPW0 25.00000000 W

F2 - Processing parameters  
SI 8192  
SF 125.7779045 MHz  
WDW DE  
SSB 0  
LB 200.00 Hz  
GB 0  
PC 1.00

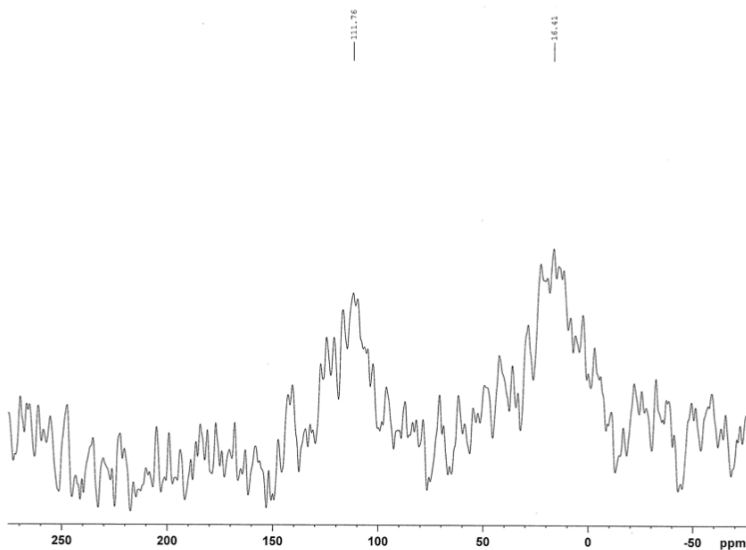

(b)

Sample 1  
20 KHz MAS  
CP: 2ms Contact  
147KHz SPINAL64 Decuplig

Current Data Parameters  
NAME uncc5\_2100809  
EXPNO 1  
PROCNO 1

F2 - Acquisition Parameters  
Date\_ 20210809  
Time 10.56 h  
INSTRUM spect  
PROBHD H134610\_0001 ( CP  
PULPROG 2200  
SOLVENT None  
NS 1024  
DS 8  
SWH 44117.648 Hz  
FIDRES 40.106953 Hz  
AQ 0.0249333 sec  
RG 199.22  
DW 11.333 usec  
DE 6.58 usec  
TE 13.5 K  
D1 2.00000000 sec  
ZGPGTNS  
SFO1 125.7904828 MHz  
NUC1 13C  
P15 2000.00 usec  
PLW1 36.00000000 W  
SFO2 500.2117507 MHz  
NUC2 1H  
CNSF21 1.0000000  
CPDPRG2 spinal64  
P3 1.80 usec  
PCPD2 3.50 usec  
PLW2 0 W  
PLW12 45.00000000 W  
SPNAM[0] ramp70100.100  
SFO1D 0.500  
SPOTFS0 0 Hz  
SPW0 25.00000000 W

F2 - Processing parameters  
SI 8192  
SF 125.7779045 MHz  
WDW DE  
SSB 0  
LB 200.00 Hz  
GB 0  
PC 1.00

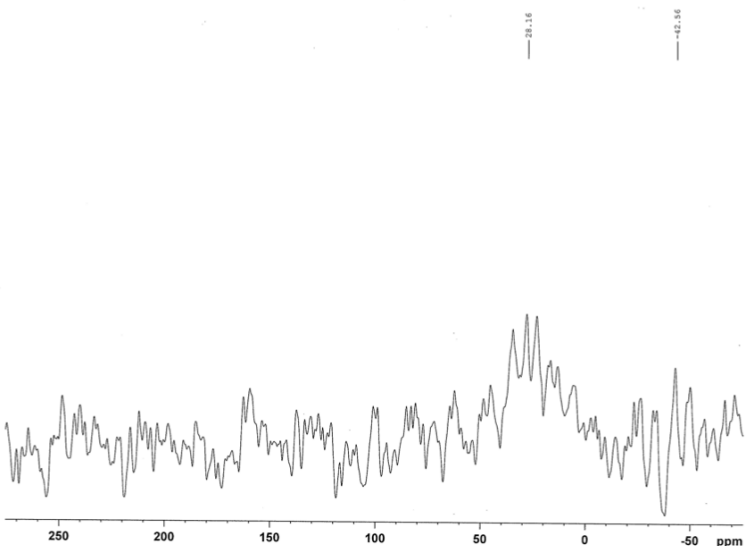

**Figure S8.** Solid State CP-MAS  $^{13}\text{C}$ -NMR spectra of (a) **2** and (b)  $\text{Co}_4\text{S}_4\text{-MCOP}$ . The spectra are unable to be resolved due to the paramagnetic nature of the compounds.

## V. Infrared Spectroscopy

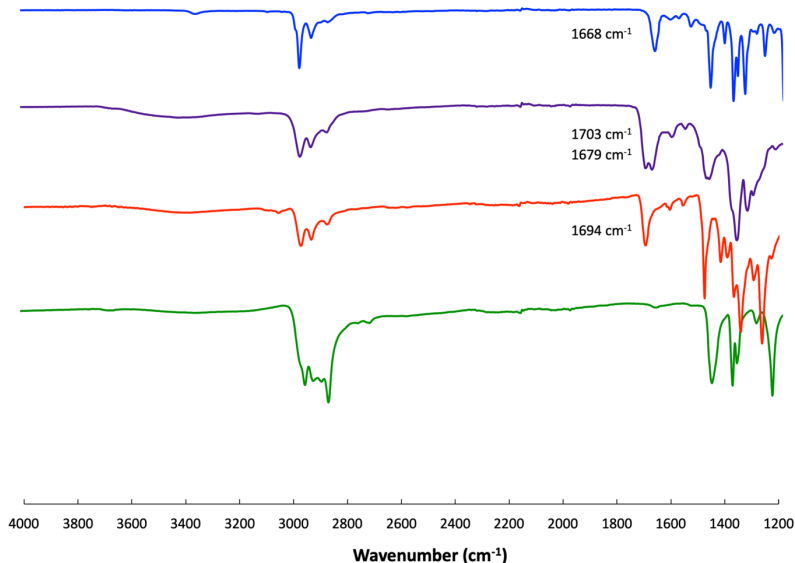

**Figure S9.** Infrared spectra of **4** (blue), Co<sub>4</sub>S<sub>4</sub>-MCOP (purple), **2** (red), and **1** (green).

## VI. X-ray photoelectron spectroscopy

Thermo Scientific Advantage Data System software was used for the acquisition and processing of the data. Using a smart background, atomic percentages were calculated from the absolute peak intensity signal of each element detected in the survey spectra of each sample. Elements detected in the survey spectra were studied at characteristic binding energies (BE) to assess the intensity (count/second) of each signal. Characteristic binding energies were compared with data from the Thermo Fisher XPS Knowledge Database. Sulphur spectra were collected in a binding energy range of 157-174 eV. Carbon spectra were collected in a binding energy range of 279-294 eV. Nitrogen spectra were collected in a binding energy range of 392-406 eV. Oxygen spectra were collected in a binding energy range of 525 - 534 eV. Cobalt spectra were collected in a binding energy range of 771 - 812 eV. XPS measurements were made at 3 discrete spots on each powdered sample. A slight increase in oxygen percent is expected due to oxidation during transfer, as well as background adventitious carbon is expected due to surface contamination (~285 eV). Reported atomic compositions are calculated from the average of the three spot measurements of each sample.

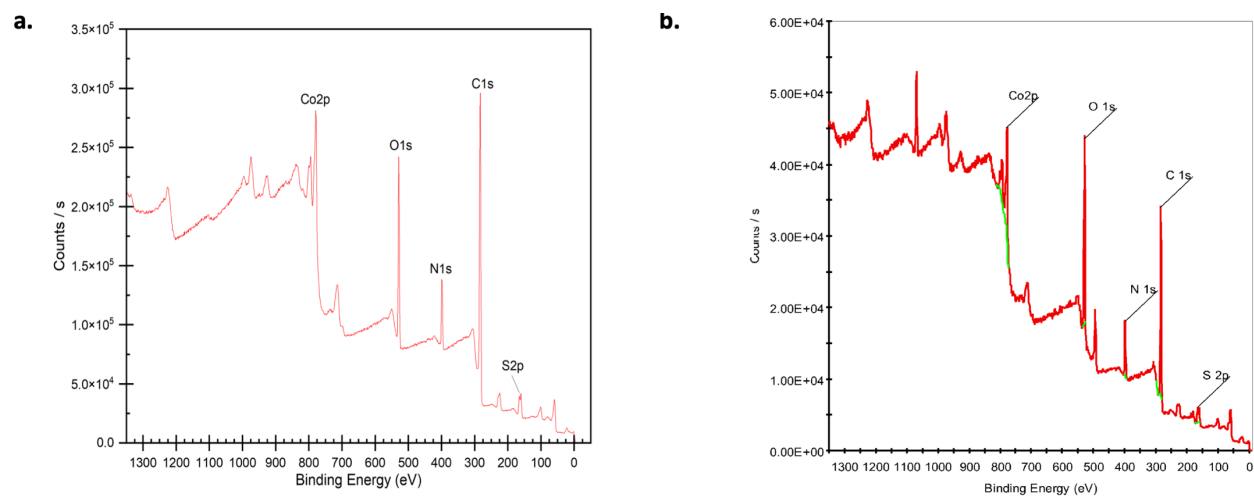

**Figure S10.** XPS survey spectra of (a) **2** and (b) Co<sub>4</sub>S<sub>4</sub>-MCOP.

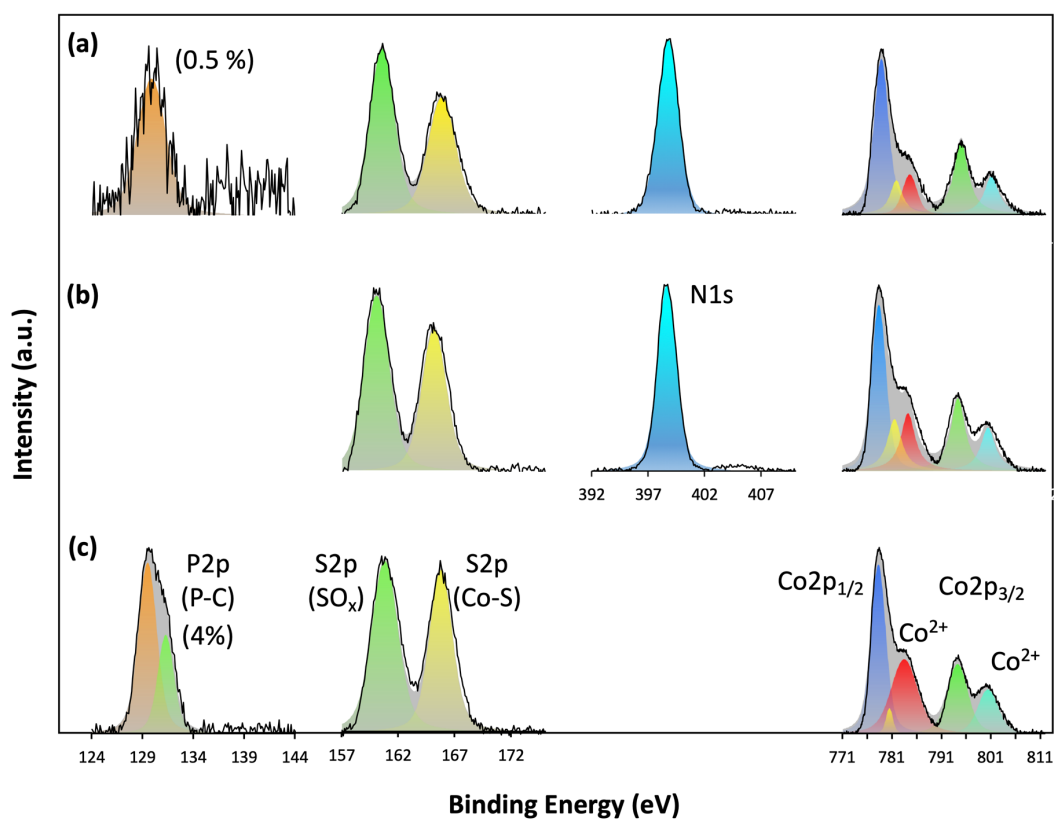

**Figure S11.** High Resolution X-ray photoelectron spectra of (a) Co<sub>4</sub>S<sub>4</sub>-MCOP, (b) [Co<sub>4</sub>S<sub>4</sub>(Pr<sup>i</sup><sub>2</sub>NHCBz)<sub>4</sub>] **2**, and (c) [Co<sub>4</sub>S<sub>4</sub>(PPri<sub>3</sub>)<sub>4</sub>] **1**.

## VII. UV-Vis Absorption Spectroscopy

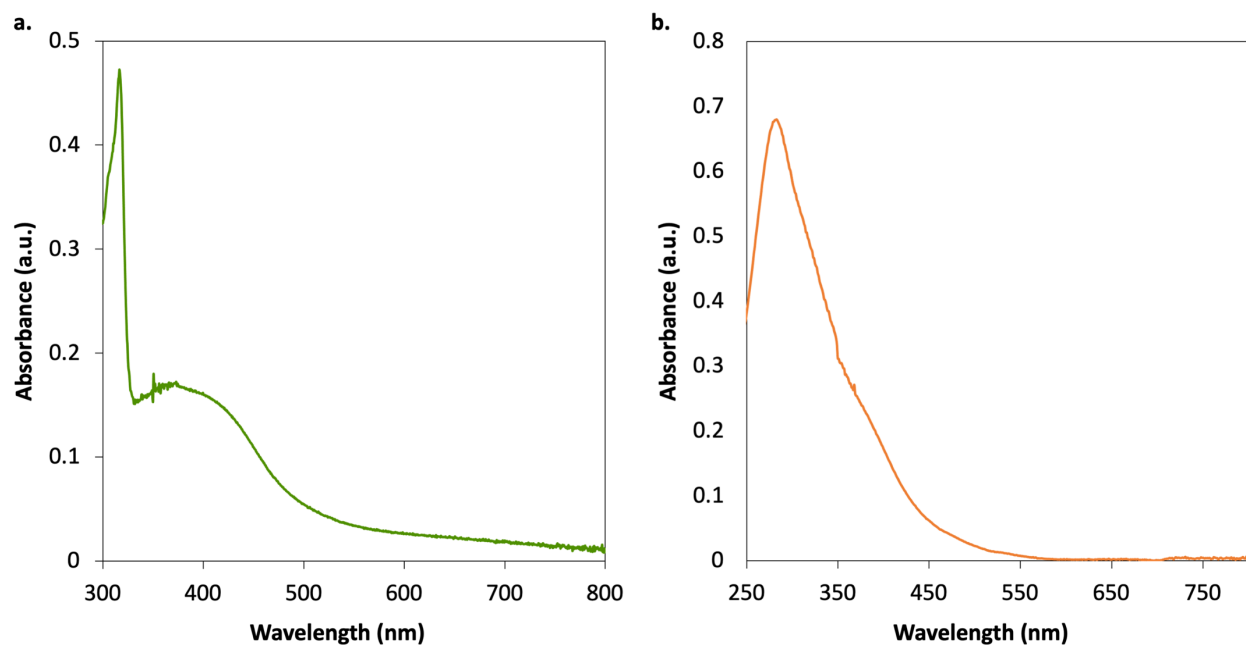

**Figure S12.** UV-vis absorption spectra of (a) **2** (0.1 mM in THF) and (b) **1** (0.1 mM in THF).

## VIII. Surface Area Analysis

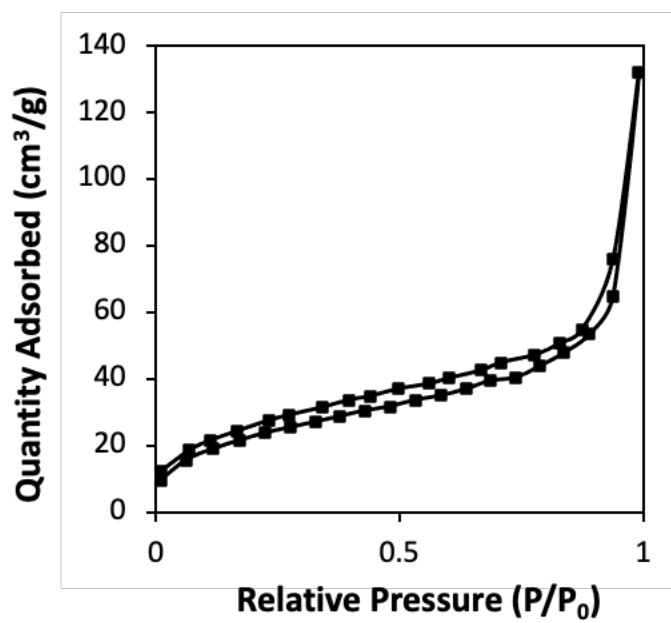

**Figure S13.**  $N_2$  adsorption and desorption isotherms at 77K of  $Co_4S_4$ -MCOP.

## IX. Electrochemistry

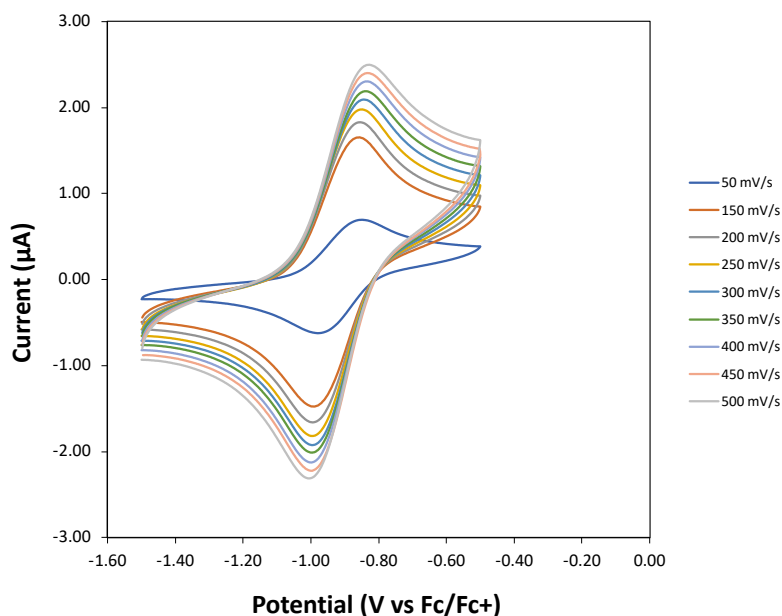

**Figure S14.** Cyclic voltammograms of  $\text{Co}_4\text{S}_4$ -MCOP modified glassy carbon working electrode at various scan rates. Recorded using a Pt wire counter electrode and Pt pseudo reference electrode in acetonitrile with  $\text{TBAPF}_6$  as the supporting electrolyte and referenced vs  $\text{Fc}/\text{Fc}^+$ .

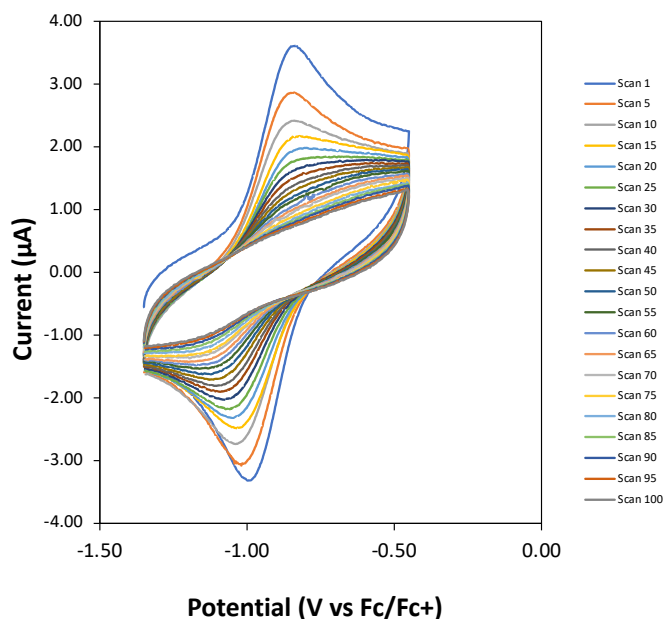

**Figure S15.** Cyclic voltammograms of  $\text{Co}_4\text{S}_4$ -MCOP modified glassy carbon working electrode scanned at 50 mV/s for 100 sequential scans. Recorded using a Pt wire counter electrode and Pt pseudo reference electrode in acetonitrile with  $\text{TBAPF}_6$  as the supporting electrolyte and referenced vs  $\text{Fc}/\text{Fc}^+$ .

## X. Digestion/Excision Experiment

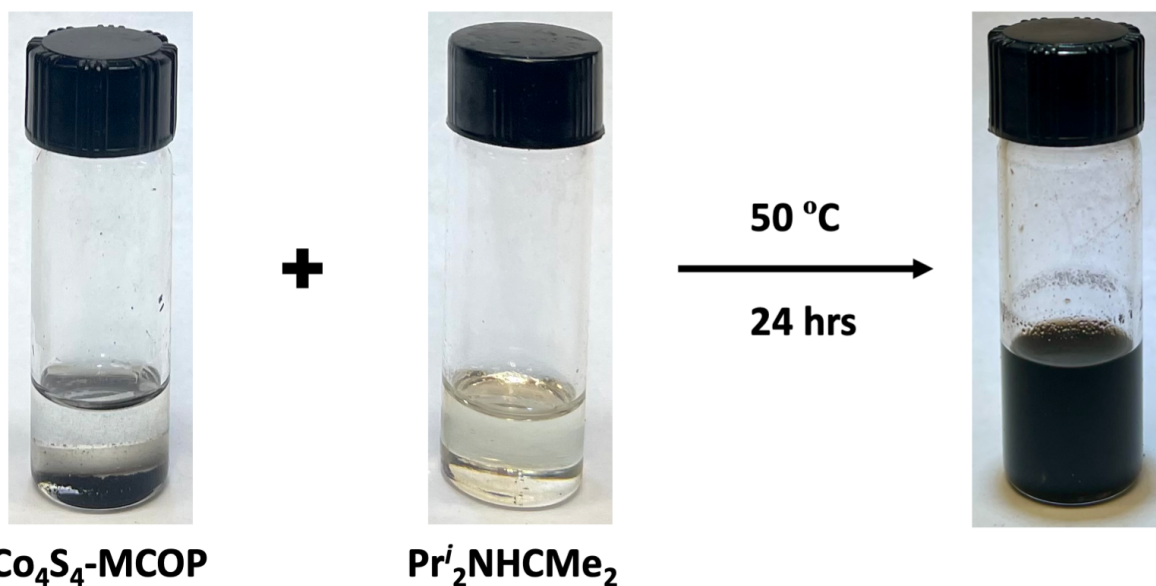

**Figure S16.** Images from digestion experiment. Suspension of  $\text{Co}_4\text{S}_4\text{-MCOP}$  and  $\text{Pr}^i_2\text{NHCMe}_2$  (20 equivalents) in  $\text{C}_6\text{D}_6$  were mixed and heated for  $50\text{ }^\circ\text{C}$  for 24 hours.

## XI. SEM Micrographs of Modulated Polymerization

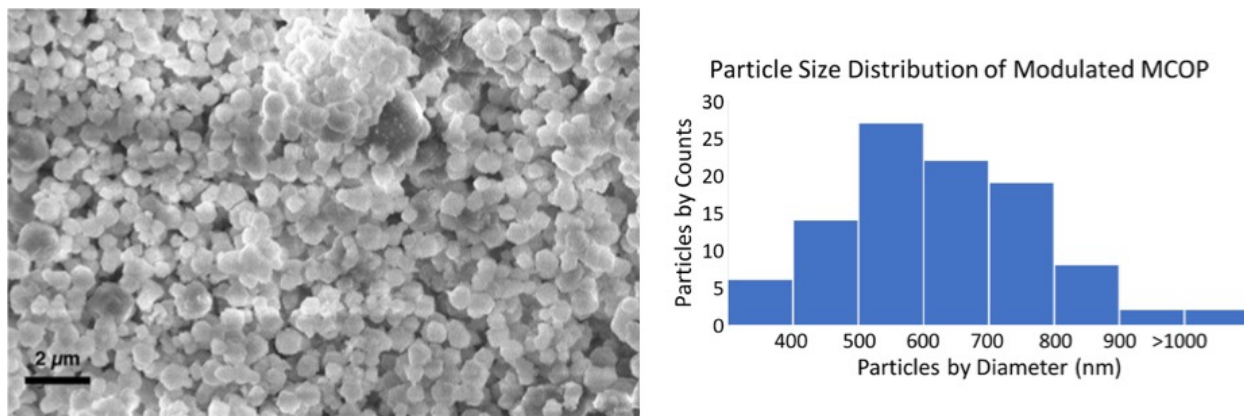

**Figure S17.** SEM micrograph from modulated synthesis of  $\text{Co}_4\text{S}_4\text{-MCOP}$  using 10 equivalents of  $\text{Pr}^i_2\text{NHCMe}_2$  as a coordination modulator in toluene and particle size distribution histogram as calculated from a sample size of 100 using ImageJ.<sup>3</sup>

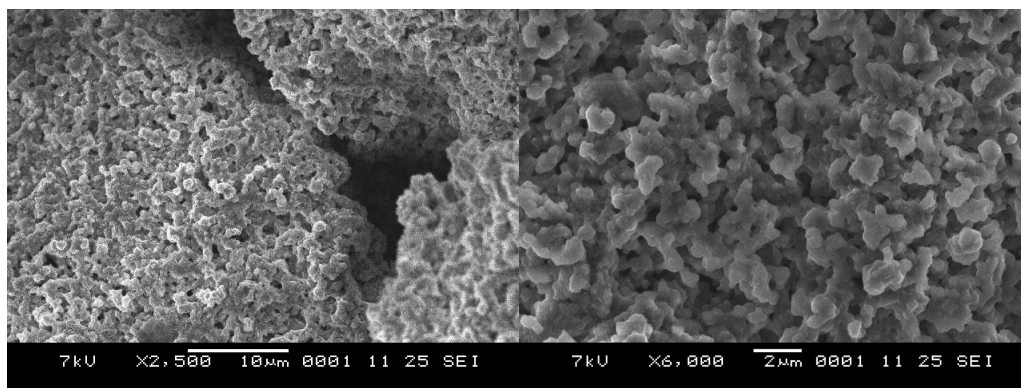

**Figure S18.** SEM micrographs from modulated synthesis of  $\text{Co}_4\text{S}_4$ -MCOP using 10 equivalents of  $\text{Pr}_2\text{NHCMe}_2$  as a coordination modulator in dioxane.

## XII. Pre and Post Cyclic Voltammetry SEM/EDS Study

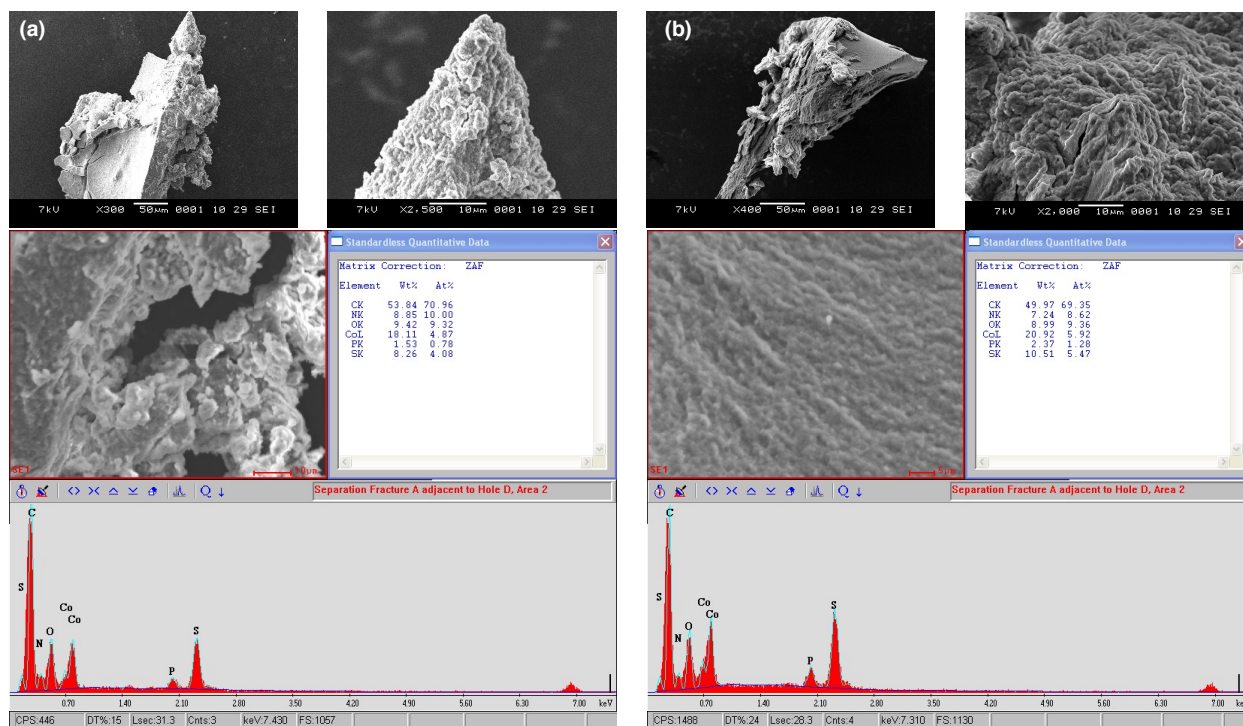

**Figure S19.** (a) SEM micrographs and EDS scans of  $\text{Co}_4\text{S}_4$ -MCOP before cyclic voltammetry

### XIII. Characterization of Co<sub>4</sub>S<sub>4</sub>-MCOP-Et

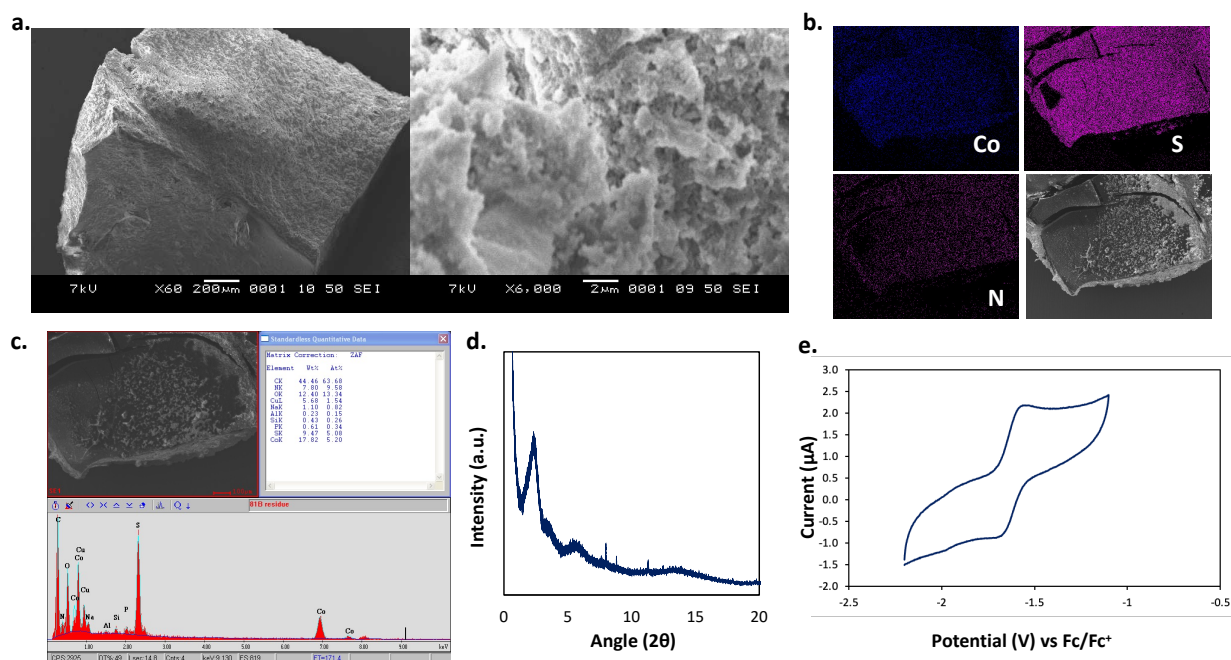

**Figure S20.** Characterization of Co<sub>4</sub>S<sub>4</sub>-MCOP-Et. SEM micrographs (a); EDS mapping (b); EDS scans and elemental composition (c); PXRD pattern (d); solid-state cyclic voltammetry of polymer-modified glassy carbon working electrode, Pt counter electrode, and Pt pseudo reference electrode at a scan rate of 100 mVs<sup>-1</sup> in a solution of acetonitrile with TBAPF<sub>6</sub> as the supporting electrolyte and referenced vs Fc/Fc<sup>+</sup>.

#### XIV. X-ray Diffraction Procedures and Tables

X-ray diffraction data were collected using an Agilent/Oxford Diffraction Gemini A Ultra diffractometer. The diffractometer was equipped with a sealed-tube Mo source with a graphite monochromator ( $\lambda=0.71073 \text{ \AA}$ ) and a sealed-tube Cu source with graphite focusing optics ( $\lambda=1.54184 \text{ \AA}$ ). In all cases data were collected to better than  $0.8 \text{ \AA}$  resolution.

The CrysAlisPro diffractometer software<sup>4</sup> provided intensity data corrected for Lorentz, polarization, and absorption effects. Preliminary structure solutions were found with the AutoChem software package<sup>4</sup>. Final structures were solved with SHELXT<sup>5</sup> (direct methods) and refined with SHELXL<sup>6</sup>, using the Olex2 software package<sup>7</sup>. Anisotropic refinement for all non-hydrogen atoms was performed. Hydrogen atoms were placed in calculated positions. Compound  $[\text{Co}_4\text{S}_4(\text{Pr}^i_2\text{NHCBz})_4]$  was refined using a solvent mask applied using BYPASS<sup>8</sup>. Using the solvent mask, 45 electrons were found in a volume of  $445 \text{ \AA}^3$  in 2 voids per unit cell. This is consistent with the presence of  $0.5[\text{C}_4\text{H}_{10}\text{O}_1]$  per Asymmetric Unit which account for 42 electrons per unit cell.

Publication tables and graphics were generated with the WinGX suite of programs.<sup>9</sup>

**Table 1 Crystal data and structure refinement for biscarbene 4.**

|                                             |                                                               |
|---------------------------------------------|---------------------------------------------------------------|
| Identification code                         | ac_cb_c20h30n4_cu                                             |
| Empirical formula                           | C <sub>20</sub> H <sub>30</sub> N <sub>4</sub>                |
| Formula weight                              | 326.48                                                        |
| Temperature/K                               | 101(2)                                                        |
| Crystal system                              | monoclinic                                                    |
| Space group                                 | P2 <sub>1</sub> /c                                            |
| a/Å                                         | 8.7820(3)                                                     |
| b/Å                                         | 9.2791(3)                                                     |
| c/Å                                         | 11.5020(5)                                                    |
| α/°                                         | 90                                                            |
| β/°                                         | 94.287(3)                                                     |
| γ/°                                         | 90                                                            |
| Volume/Å <sup>3</sup>                       | 934.66(6)                                                     |
| Z                                           | 2                                                             |
| ρ <sub>calc</sub> /g/cm <sup>3</sup>        | 1.160                                                         |
| μ/mm <sup>-1</sup>                          | 0.537                                                         |
| F(000)                                      | 356.0                                                         |
| Crystal size/mm <sup>3</sup>                | 0.18 × 0.085 × 0.051                                          |
| Radiation                                   | Cu Kα (λ = 1.54184)                                           |
| 2θ range for data collection/°              | 10.1 to 133.722                                               |
| Index ranges                                | -10 ≤ h ≤ 9, -10 ≤ k ≤ 11, -13 ≤ l ≤ 13                       |
| Reflections collected                       | 8721                                                          |
| Independent reflections                     | 1655 [R <sub>int</sub> = 0.0514, R <sub>sigma</sub> = 0.0323] |
| Data/restraints/parameters                  | 1655/0/113                                                    |
| Goodness-of-fit on F <sup>2</sup>           | 1.052                                                         |
| Final R indexes [I ≥ 2σ (I)]                | R <sub>1</sub> = 0.0394, wR <sub>2</sub> = 0.0922             |
| Final R indexes [all data]                  | R <sub>1</sub> = 0.0544, wR <sub>2</sub> = 0.1017             |
| Largest diff. peak/hole / e Å <sup>-3</sup> | 0.14/-0.20                                                    |

**Table 2 Crystal data and structure refinement for [Co<sub>4</sub>S<sub>4</sub>(Pr<sup>i</sup><sub>2</sub>NHCBz)<sub>4</sub>].**

|                                             |                                                                               |
|---------------------------------------------|-------------------------------------------------------------------------------|
| Identification code                         | g2-50                                                                         |
| Empirical formula                           | C <sub>52</sub> H <sub>72</sub> Co <sub>4</sub> N <sub>8</sub> S <sub>4</sub> |
| Formula weight                              | 1173.13                                                                       |
| Temperature/K                               | 100.00(10)                                                                    |
| Crystal system                              | triclinic                                                                     |
| Space group                                 | P-1                                                                           |
| a/Å                                         | 12.9073(5)                                                                    |
| b/Å                                         | 13.2862(5)                                                                    |
| c/Å                                         | 17.5673(6)                                                                    |
| α/°                                         | 94.342(3)                                                                     |
| β/°                                         | 95.063(3)                                                                     |
| γ/°                                         | 93.514(3)                                                                     |
| Volume/Å <sup>3</sup>                       | 2985.22(19)                                                                   |
| Z                                           | 2                                                                             |
| ρ <sub>calc</sub> /g/cm <sup>3</sup>        | 1.305                                                                         |
| μ/mm <sup>-1</sup>                          | 1.271                                                                         |
| F(000)                                      | 1224.0                                                                        |
| Crystal size/mm <sup>3</sup>                | 0.481 × 0.318 × 0.145                                                         |
| Radiation                                   | Mo Kα (λ = 0.71073)                                                           |
| 2θ range for data collection/°              | 6.74 to 57.264                                                                |
| Index ranges                                | -16 ≤ h ≤ 16, -16 ≤ k ≤ 17, -22 ≤ l ≤ 22                                      |
| Reflections collected                       | 59734                                                                         |
| Independent reflections                     | 13795 [R <sub>int</sub> = 0.0580, R <sub>sigma</sub> = 0.0620]                |
| Data/restraints/parameters                  | 13795/0/629                                                                   |
| Goodness-of-fit on F <sup>2</sup>           | 1.028                                                                         |
| Final R indexes [I ≥ 2σ (I)]                | R <sub>1</sub> = 0.0416, wR <sub>2</sub> = 0.0813                             |
| Final R indexes [all data]                  | R <sub>1</sub> = 0.0695, wR <sub>2</sub> = 0.0958                             |
| Largest diff. peak/hole / e Å <sup>-3</sup> | 0.72/-0.40                                                                    |

## XV. References

1. O. V. Starikova, G. V. Dolgushin, L. I. Larina, T. N. Komarova and V. A. Lopyrev, *Arkivoc*, 2003, **2003**, 119–124.
2. H. V. Huynh, Y. Han, J. H. H. Ho and G. K. Tan, *Organometallics*, 2006, **25**, 3267–3274.
3. Rasband, W.S., ImageJ, U.S. National Institutes of Health, Bethesda, Maryland, USA, <https://imagej.nih.gov/ij/>, 1997-2018
4. Rigaku Oxford Diffraction, CrysAlisPro Software system, version 1.171.38.46, Rigaku Corporation, Oxford, UK. (2018).
5. G. M. Sheldrick, *Acta Cryst. C* **17**, 112-122 (2015).
6. G. M. Sheldrick, *Acta Cryst. A* **64**, 112-122 (2008).
7. Dolomanov, O.V.; Bourhis, L.J.; Gildea, R.J.; Howard, J.A.K.; Puschmann, H., OLEX2: A complete structure solution, refinement and analysis program. *J. Appl. Cryst.*, **42**, 339-341 (2009).
8. van der Sluis, P.; Spek, A. L. *Acta Crystallographica Section A* **1990**, *46* (3), 194–201.
9. L. J. Farrugia, *J. Appl. Cryst.* **45**, 849-854. (2012)
